# Supplementary material for: Intranasal Trans-Sialidase Vaccine Mitigates Acute and Chronic Pathology in a Preclinical Oral Chagas Disease Model
Source: Preprints.org preprint supplement (doi:10.20944/preprints202409.1328.v1), 2024-09-17
Supplement: Supplementary file 1 [file supplementary]

| **Gene** | **Forward (5’-3’)** | **Reverse (5’-3’)** |
| --- | --- | --- |
| ***IFN-γ*** | AGACAATCAGGCCATCAGCAAC | CTCATTGAATGCTTGGCGCTG |
| ***IL-17a*** | CAAAGCTCAGCGTGTCCAAA | CTTCCCAGATCACAGAGGGATA |
| ***IL-4*** | GCCAAACGTCCTCACAGCAA | TCTGCAGCTCCATGAGAACACT |
| ***IL-2*** | CCTGAGCAGGATGGAGAATTACA | CCTGAGCAGGATGGAGAATTACA |
| ***IL-6*** | GAGGATACCACTCCCAACAGACC | AAGTGCATCATCGTTGTTCATACA |
| ***L-5*** | AGCACAGTGGTGAAAGAGACC | TTATGAGTAGGGACAGGAAGCC |
| ***IL-21*** | AGAAGGCCAAACTCAAGCCA | CATACGAATCACAGGAAGGGCA |
| ***TNF-a*** | CACAGAAAGCATGATCCGCGAC | GAACTTCTCATCCCTTTGGGGAC |
| ***IL-1b*** | AGACAACTGCACTACAGGCTC | TTGTCGTTGCTTGGTTCTCCT |
| ***TGF-b*** | TGACGTCACTGGAGTTGTACGG | GGTTCATGTCATGGATGGTGC |
| ***IL-10*** | CAAGCCTTATCGGAAATGATCCA | CCTTGTAGACACCTTGGTCTTG |
| ***iNOS*** | GACGAGACGGATAGGCAGAGATTG | CCTGGGAGGAGCTGATGGAGTAG |
| ***MCP-1*** | GGCTCAGCCAGATGCAGTTAA | CCTACTCATTGGGATCATCTTGCT |
| ***Arg II*** | TGATTGGCAAAAGGCAGAGG | CTAGGAGTAGGAAGGTGGTC |
| ***GAPDH*** | AGCAATGCATCCTGCACCACCA | ATGCCAGTGAGCTTCCCGTTCA |

**Table S1:** Primer sequences used for RT-qPCR.

**
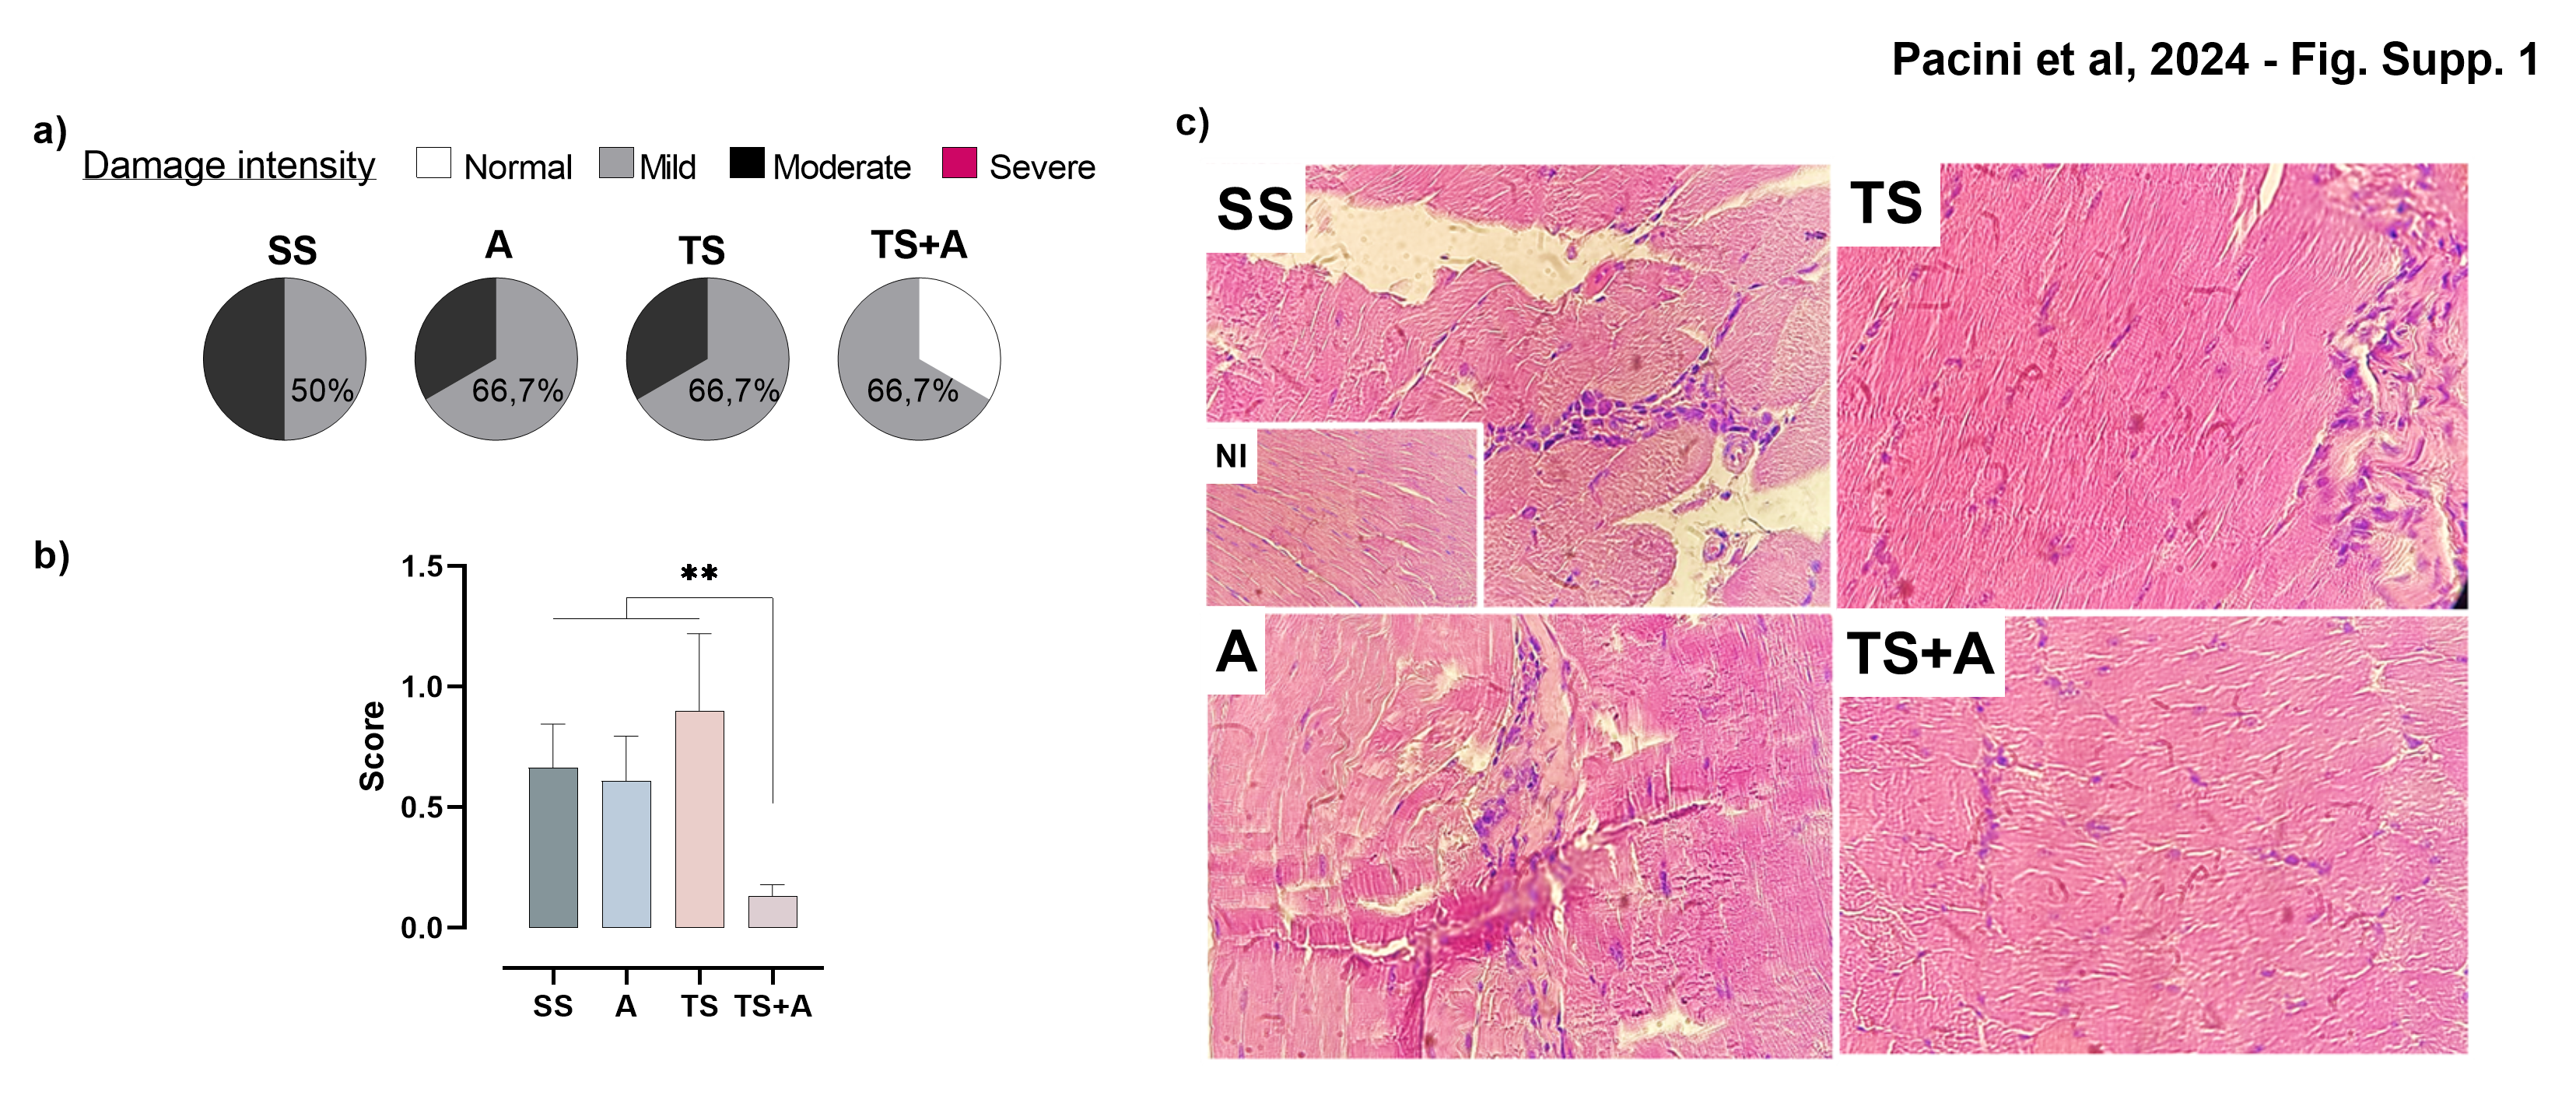
**

**Figure S1:** Histopathological examination of skeletal muscle at day 17 pi. Histological sections of 5 μm were stained with hematoxylin/eosin **a**) Infiltrate intensities were classified as mild, moderate, or severe. Pie charts illustrate the proportion of animals within each group that exhibited each type of inflammatory infiltrate. **b**) The inflammatory score estimates the degree of tissue damage in each group based on the number and intensity of inflammatory infiltrates. **c)** Representative images of tissues from immunized and orally infected animals. The smaller image inserted in the photograph corresponding to the SS group shows a normal tissue from an uninfected and unimmunized animal (40X magnification). **p<0.001.

.


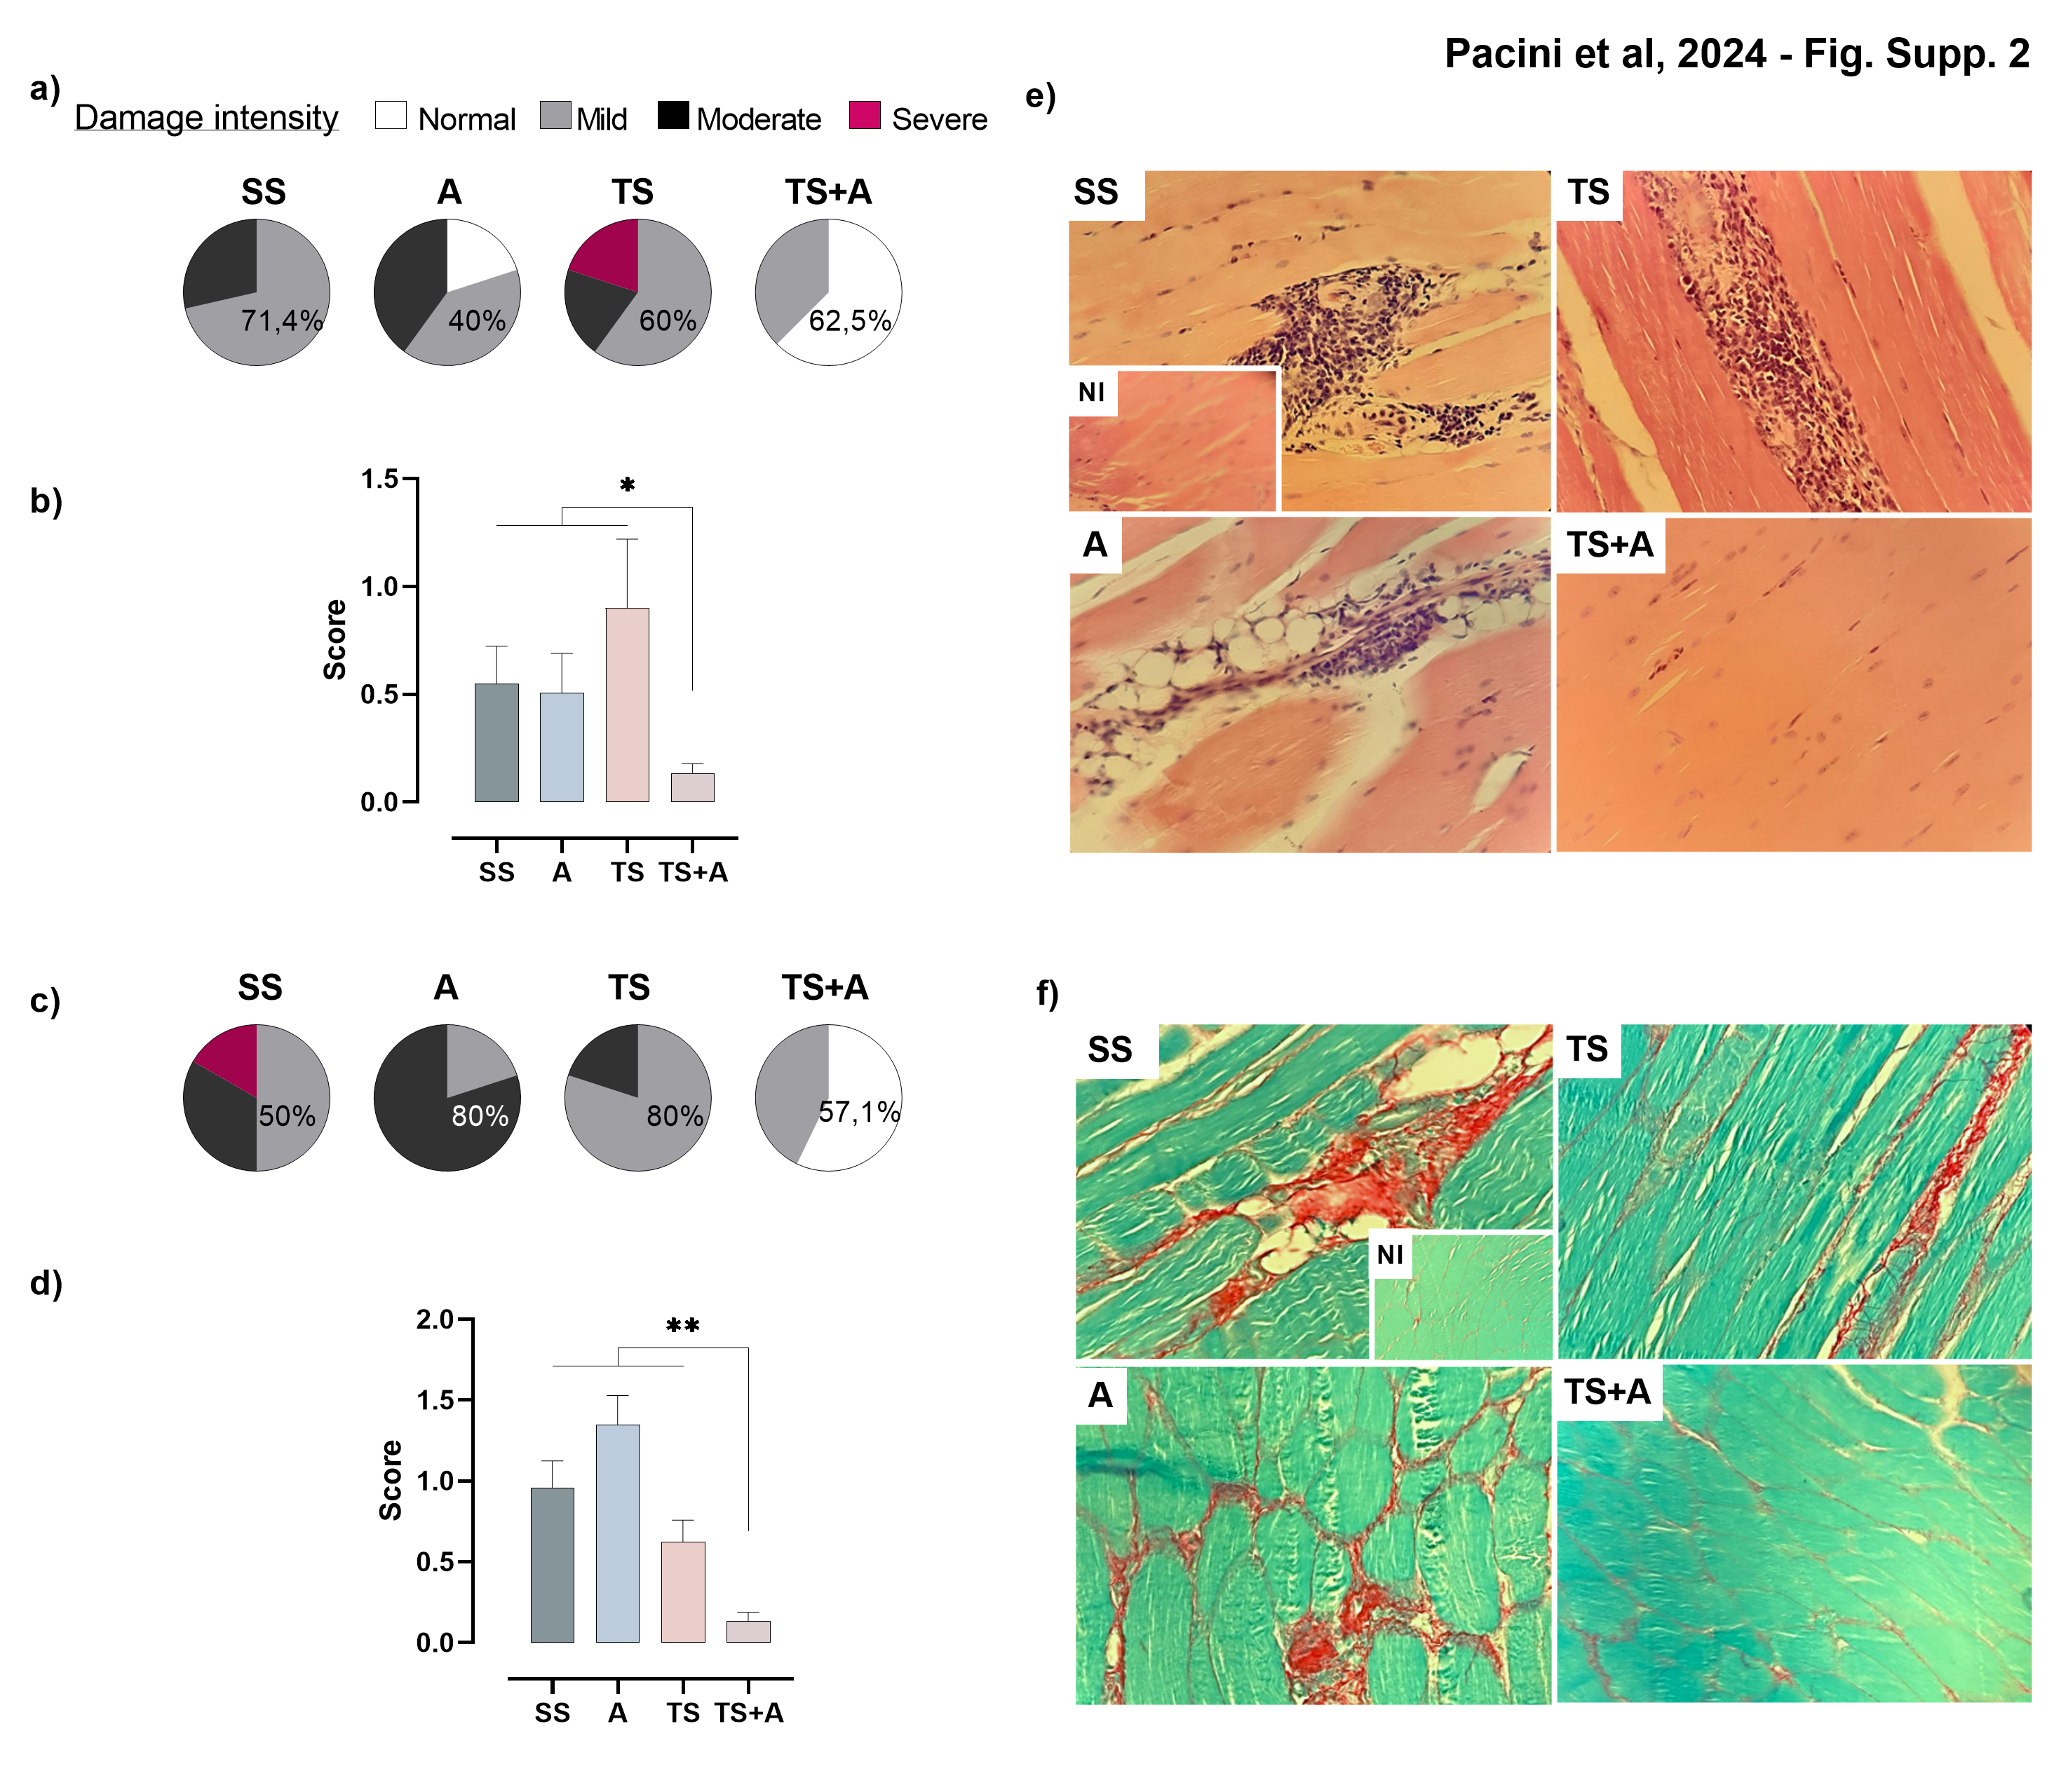


**Figure S2:** Histopathological examination of skeletal muscle day at 111 pi. Histological sections of 5 μm were stained with hematoxylin/eosin and picrosirius red. Chronic infiltrates and fibrosis were classified as mild, moderate, or severe. Pie charts show the relative proportion of each type of inflammatory infiltrate/group (**a**) or fibrosis (**c**). Bar graphs show the estimation of tissue damage based on the number and intensity of inflammatory infiltrates (**b**) or fibrosis (**d**). Images show representative histological findings in the muscle tissue of immunized and orally infected animals: inflammatory infiltrates (**e**) and fibrosis (**f**). The smaller images inserted in the SS group show normal muscle tissues from uninfected and non-immunized mice (magnification 40X) *p<0.05 **p<0.001.
